# Supplementary material for: A small molecule sensor for fluoride based on an autoinductive, colorimetric signal amplification reaction
Source: Royal Society of Chemistry journal article supplement (doi:10.1039/c2ob25363a), 2012-01-01

# A Small Molecule Sensor for Fluoride Based on an Autoinductive, Colorimetric Signal Amplification Reaction

Matthew S. Baker and Scott T. Phillips\*

Department of Chemistry, The Pennsylvania State University

104 Chemistry Building, University Park, 16802, USA

Email: sphillips@psu.edu

## Supporting Information

### Table of Contents

|                                                                                                                  |     |
|------------------------------------------------------------------------------------------------------------------|-----|
| Materials                                                                                                        | S1  |
| Instrumentation                                                                                                  | S2  |
| Synthesis of amplification reagent <b>1</b>                                                                      | S2  |
| Synthesis of control reagent <b>3</b>                                                                            | S3  |
| Procedure for determining solvent conditions                                                                     | S3  |
| Tables of color intensity for solvent experiment                                                                 | S4  |
| Procedure for measuring the autoinductive colorimetric readout provided by reagent <b>1</b> in methanol          | S6  |
| Tables of color intensity for Figure 3a                                                                          | S6  |
| Selectivity of compound <b>1</b> , in methanol, for fluoride over other anions                                   | S8  |
| Tables of color intensity for Figure 3c                                                                          | S8  |
| Procedure for measuring the colorimetric readout provided by reagent <b>3</b>                                    | S9  |
| Tables of color intensity for Figure 4b                                                                          | S9  |
| Procedure for measuring the autoinductive colorimetric readout provided by reagent <b>1</b> in isopropyl alcohol | S11 |
| Tables of color intensity for Figure 5a                                                                          | S11 |
| Selectivity of compound <b>1</b> for fluoride over other anions                                                  | S13 |
| Tables of color intensity for Figure 5c                                                                          | S13 |
| References                                                                                                       | S14 |

### Materials:

All reactions were performed in flame-dried glassware under a positive pressure of argon. Air- and moisture-sensitive liquids were transferred by syringe or stainless steel cannula. Organic solutions were concentrated by rotary evaporation (25–40 mmHg) at ambient temperature, unless otherwise noted. *p*-Difluoromethylbenzoic acid, 4-formylbenzoic acid, and all other reagents were purchased commercially and were used as received unless otherwise noted. Flash-column chromatography was performed as described by Still et al.,<sup>1</sup> employing silica gel (60-Å pore size, 32–63 µm, standard grade, Dynamic Adsorbents). Thin layer chromatography was carried out on Dynamic Adsorbents

silica gel TLC (20 × 20 cm w/h, F-254, 250 μm). Deionized water was purified with a Millipore-purification system (Barnstead EASYpure® II UV/UF). Kinetics experiments were carried out in 1.7 mL VWR microcentrifuge tubes.

### Instrumentation:

Photographs were taken with a Nikon digital camera (D40). Proton nuclear magnetic resonance (<sup>1</sup>H NMR) spectra were recorded using a Bruker CDPX-300 (300 MHz) NMR spectrometer at 25 °C. Proton chemical shifts are expressed in parts per million (ppm, δ scale) and are referenced to residual protium in the NMR solvent (CDCl<sub>3</sub>, δ 7.26 ppm). Data are represented as follows: chemical shift, multiplicity (s = singlet, d = doublet, t = triplet, q = quartet, m = multiplet and/or multiple resonances), integration, and coupling constant (*J*) in Hertz. Carbon nuclear magnetic resonance spectra (<sup>13</sup>C NMR) were recorded on a Bruker AMX-360 (75 MHz) NMR spectrometer at 25 °C. Carbon chemical shifts are expressed in parts per million (ppm, δ scale) and are referenced to the carbon resonances of the NMR solvent (CDCl<sub>3</sub>, δ 77.0).

### Synthesis of Amplification Reagent 1:

#### Amplification Reagent 1.

*p*-Difluoromethylbenzoic acid (**2**) (0.2 g, 1.2 mmol, 1.0 equiv) was dissolved in dichloromethane (5.8 mL), and the resulting solution was cooled to 0 °C. Oxalyl chloride (0.12 mL, 1.4 mmol, 1.2 equiv) was added dropwise to the ice-cold solution, followed by 5 drops of *N,N*-dimethylformamide. The reaction mixture was heated to 100 °C and was stirred for 1 h. The solution was removed from heat and allowed to cool to 23 °C, at which point the solution was concentrated under reduced pressure. The resulting residue was re-dissolved in acetone (2.9 mL) and was cooled to 0 °C. A solution of sodium azide (0.23 g, 3.5 mmol, 3 equiv; dissolved in 2.9 mL water) was added dropwise, and the reaction solution was stirred at 0 °C for 1 h. The solution was diluted with ethyl acetate (50 mL) and the layers were separated. The organic layer was dried over sodium sulfate, the solids were filtered through a fritted Büchner funnel, and the remaining liquid was concentrated under reduced pressure. The residue was dissolved in toluene (5.8 mL), and this solution was heated to 100 °C for 1 h. The reaction mixture was allowed to cool to room temperature, and *p*-[(*tert*-butyldimethylsilyl)oxy]benzyl alcohol (0.33 g, 1.4 mmol, 1.2 equiv) was added in one portion. The reaction mixture was heated to 100 °C, and was stirred at this temperature for 3 h. The solution was cooled to room temperature and concentrated, and the resulting residue was purified via column chromatography (elution with 5% EtOAc–hexanes) to afford compound **1** as a white solid (0.41 g, 1.0 mmol, 87%). <sup>1</sup>H NMR (CDCl<sub>3</sub>): δ 7.51 (d, 2 H, *J* = 9), 7.46 (d, 2 H, *J* = 9), 7.31 (d, 2 H, *J* = 9), 6.88 (d, 2 H, *J* = 9), 6.63 (t, 1 H, *J* = 57), 4.92 (s, 2 H), 1.02 (s, 9 H), 0.24 (s, 6 H). This <sup>1</sup>H NMR data matches previously published data for **1**.<sup>2</sup>

## Synthesis of Control Reagent 3:

### 4-(*tert*-Butyldimethylsilyloxy)benzyl 4-Formylphenylcarbamate (3).

4-Formylbenzoic acid (0.33 g, 2.18 mmol, 1.0 equiv) was added to dichloromethane (11 mL) and the resulting solution was cooled to 0 °C. Oxalyl chloride (0.37 mL, 4.36 mmol, 2.0 equiv) was added dropwise to the ice-cold solution, followed by 4 drops of *N,N*-dimethylformamide. The reaction mixture was stirred at 0 °C for 1 h. The solution was allowed to warm to 23 °C, at which point the solution was concentrated under reduced pressure. The resulting residue was re-dissolved in acetone (5.5 mL) and was cooled to 0 °C. A solution of sodium azide (0.28 g, 4.36 mmol, 2 equiv; dissolved in 5.5 mL water) was added dropwise, and the reaction solution was stirred at 0 °C for 1 h. The solution was diluted with ethyl acetate (15 mL) and the layers were separated. The organic layer was dried over sodium sulfate, the solids were filtered through a fritted Büchner funnel, and the remaining liquid was concentrated under reduced pressure. The residue was dissolved in toluene (11 mL), and this solution was heated to 100 °C for 1 h. The reaction mixture was allowed to cool to room temperature, and *p*-[(*tert*-butyldimethylsilyl)oxy]benzyl alcohol (0.52 g, 2.18 mmol, 1.0 equiv) was added in one portion. The reaction mixture was heated to 100 °C, and was stirred at this temperature for 3 h. The solution was cooled to room temperature and concentrated, and the resulting residue was purified via column chromatography (elution with 10% EtOAc–benzene) to afford compound **3** as a white solid (0.72 g, 1.87 mmol, 86%). NMR (CDCl<sub>3</sub>): δ 9.85 (s, 1 H), 7.79 (m, 3 H), 7.61 (d, 2 H, *J* = 8), 7.26 (d, 2 H, *J* = 8), 6.83 (d, 1 H, *J* = 8), 5.14 (s, 2 H), 1.00 (s, 9 H), 0.21 (s, 6 H). This <sup>1</sup>H NMR data matches previously published data for **3**.<sup>3</sup>

## Procedure for Pyridine Solvent Screen

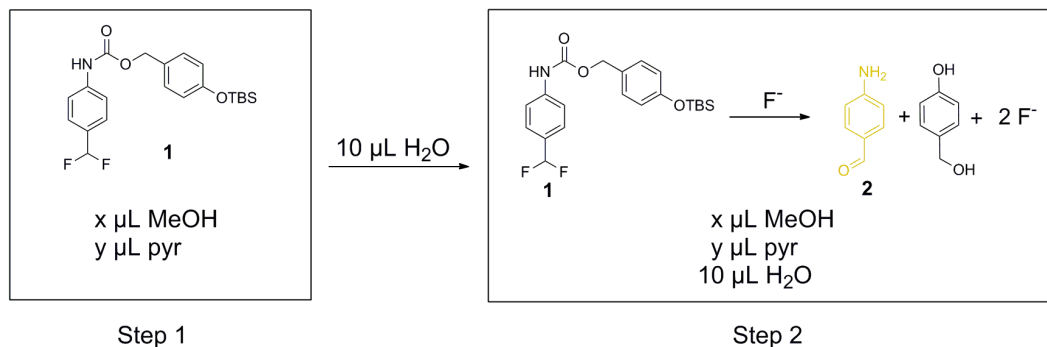

**Scheme S1.** Aliquots (10 μL) of aqueous CsF (0.62 M) were added to separate 0.12 M solutions of compound **1**. The ratios of methanol–pyridine–water tested are shown in Table S1. At hour intervals, photographs were obtained and analyzed using Adobe®Photoshop®. The digital images were cropped just above and below the solution in the centrifuge tube. The image was magnified six times and the color was inverted using the inversion setting. Using the circular marquee tool, a section of approximately 300 pixels just below the meniscus of the solution was highlighted. The mean intensity in the blue channel on the histogram function was recorded. The mean intensities were subtracted from the mean intensities for the centrifuge tubes at time 0.

### Table of time to reach maximum colorimetric signal with the volume of pyridine

**Table S1.** Rates of colorimetric production resulting from the reaction of **1** with fluoride under varying ratios of methanol to pyridine.

| MeOH (μL) | Pyridine (μL) | Time to reach max signal (h) |
|-----------|---------------|------------------------------|
| 95        | 0             | 8                            |
| 94        | 1             | 5                            |
| 93        | 2             | 5                            |
| 92        | 3             | 5                            |
| 91        | 4             | 5                            |
| 90        | 5             | 5                            |
| 80        | 25            | 6                            |
| 70        | 35            | 7                            |
| 60        | 45            | 10                           |

### Tables of Color Intensity for Pyridine Solvent Screen

**Table S2.** Intensities of color for 95:10 MeOH-H<sub>2</sub>O

| Time (h) | Trial 1 | Trial 2 | Trial 3 |
|----------|---------|---------|---------|
| 1        | 39      | 36      | 41      |
| 2        | 67      | 65      | 65      |
| 3        | 78      | 78      | 77      |
| 4        | 82      | 82      | 85      |
| 5        | 88      | 86      | 90      |
| 6        | 93      | 91      | 93      |
| 7        | 96      | 96      | 96      |
| 8        | 100     | 100     | 100     |

**Table S3.** Intensities of color for 94:1:10 MeOH-pyr-H<sub>2</sub>O

| Time (h) | Trial 1 | Trial 2 | Trial 3 |
|----------|---------|---------|---------|
| 1        | 50      | 51      | 50      |
| 2        | 73      | 73      | 73      |
| 3        | 86      | 86      | 85      |
| 4        | 93      | 95      | 94      |
| 5        | 100     | 100     | 100     |

**Table S4.** Intensities of color for 93:2:10 MeOH-pyr-H<sub>2</sub>O

| Time (h) | Trial 1 | Trial 2 | Trial 3 |
|----------|---------|---------|---------|
| 1        | 51      | 50      | 50      |
| 2        | 74      | 73      | 74      |
| 3        | 86      | 87      | 85      |
| 4        | 97      | 95      | 94      |
| 5        | 100     | 100     | 100     |

**Table S5.** Intensities of color for 92:3:10 MeOH-pyr-H<sub>2</sub>O

| Time (h) | Trial 1 | Trial 2 | Trial 3 |
|----------|---------|---------|---------|
| 1        | 49      | 50      | 48      |
| 2        | 74      | 71      | 73      |
| 3        | 86      | 87      | 85      |
| 4        | 96      | 94      | 95      |
| 5        | 100     | 100     | 100     |

**Table S6.** Intensities of color for 91:4:10 MeOH-pyr-H<sub>2</sub>O

| Time (h) | Trial 1 | Trial 2 | Trial 3 |
|----------|---------|---------|---------|
| 1        | 47      | 46      | 46      |
| 2        | 70      | 72      | 73      |
| 3        | 88      | 84      | 87      |
| 4        | 96      | 96      | 94      |
| 5        | 100     | 100     | 100     |

**Table S7.** Intensities of color for 90:5:10 MeOH-pyr-H<sub>2</sub>O

| Time<br>(h) | Trial 1 | Trial 2 | Trial 3 |
|-------------|---------|---------|---------|
| 1           | 50      | 49      | 47      |
| 2           | 73      | 71      | 72      |
| 3           | 87      | 86      | 88      |
| 4           | 97      | 96      | 96      |
| 5           | 100     | 100     | 100     |

**Table S8.** Intensities of color for 80:15:10 MeOH-pyr-H<sub>2</sub>O

| Time<br>(h) | Trial 1 | Trial 2 | Trial 3 |
|-------------|---------|---------|---------|
| 1           | 37      | 37      | 37      |
| 2           | 67      | 65      | 64      |
| 3           | 82      | 81      | 80      |
| 4           | 90      | 90      | 89      |
| 5           | 98      | 97      | 96      |
| 6           | 100     | 100     | 100     |

**Table S9.** Intensities of color for 70:25:10 MeOH-pyr-H<sub>2</sub>O

| Time<br>(h) | Trial 1 | Trial 2 | Trial 3 |
|-------------|---------|---------|---------|
| 1           | 30      | 29      | 31      |
| 2           | 59      | 58      | 57      |
| 3           | 73      | 71      | 74      |
| 4           | 82      | 81      | 84      |
| 5           | 90      | 90      | 88      |
| 6           | 96      | 97      | 97      |
| 7           | 100     | 99      | 99      |

**Table S10.** Intensities of color for 60:35:10 MeOH-pyr-H<sub>2</sub>O

| Time<br>(h) | Trial 1 | Trial 2 | Trial 3 |
|-------------|---------|---------|---------|
| 1           | 21      | 26      | 24      |
| 2           | 45      | 49      | 47      |
| 3           | 61      | 66      | 67      |
| 4           | 70      | 77      | 75      |
| 5           | 79      | 81      | 83      |
| 6           | 85      | 89      | 87      |
| 7           | 89      | 92      | 92      |
| 8           | 95      | 94      | 94      |
| 9           | 94      | 96      | 95      |
| 10          | 99      | 100     | 99      |

## Procedure for Figure 3a: Measuring the Autoinductive Colorimetric Readout Provided by Reagent 1 in Methanol.

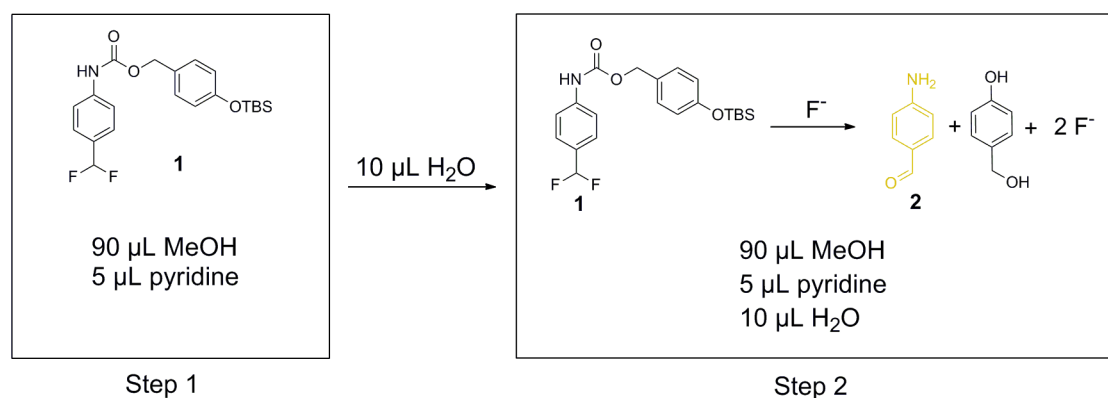

**Scheme S2.** Aliquots (10  $\mu$ L) of solutions of CsF (610  $\mu$ M – 1.22 M) were added to separate 0.12 M solutions of compound **1** in 18:1 MeOH–pyridine (95  $\mu$ L). At hour intervals, photographs were obtained and analyzed using Adobe®Photoshop®. The digital images were cropped just above and below the solution in the centrifuge tube. The image was magnified six times and the color was inverted using the inversion setting. Using the circular marquee tool, a section of approximately 300 pixels just below the meniscus of the solution was highlighted. The mean intensity in the blue channel on the histogram function was recorded. The mean intensities were subtracted from the mean intensities for the centrifuge tubes at time 0.

### Tables of Color Intensity for Figure 3a

**Table S12.** Intensities of color for 23,000 ppm fluoride

| Time (h) | Trial 1 | Trial 2 | Trial 3 |
|----------|---------|---------|---------|
| 0.25     | 41      | 39      | 40      |
| 0.5      | 65      | 64      | 66      |
| 0.75     | 77      | 76      | 79      |
| 1        | 96      | 93      | 95      |
| 1.25     | 101     | 101     | 101     |

**Table S13:** Intensities of color for 2,300 ppm fluoride

| Time (h) | Trial 1 | Trial 2 | Trial 3 |
|----------|---------|---------|---------|
| 1        | 54      | 53      | 51      |
| 2        | 73      | 75      | 73      |
| 3        | 88      | 86      | 86      |
| 4        | 101     | 101     | 101     |

**Table S14.** Intensities of color for 230 ppm fluoride

| Time (h) | Trial 1 | Trial 2 | Trial 3 |
|----------|---------|---------|---------|
| 1        | 13      | 10      | 11      |
| 2        | 25      | 26      | 24      |
| 3        | 40      | 41      | 39      |
| 4        | 56      | 56      | 55      |
| 5        | 66      | 68      | 65      |
| 6        | 76      | 76      | 75      |
| 7        | 84      | 87      | 84      |
| 8        | 90      | 88      | 87      |
| 9        | 95      | 95      | 95      |
| 10       | 101     | 101     | 101     |

**Table S15.** Intensities of color for 23 ppm fluoride

| Time<br>(h) | Trial 1 | Trial 2 | Trial 3 |
|-------------|---------|---------|---------|
| 1           | 1       | 2       | 2       |
| 3           | 8       | 6       | 8       |
| 5           | 12      | 9       | 11      |
| 7           | 25      | 19      | 22      |
| 9           | 45      | 36      | 39      |
| 11          | 67      | 61      | 62      |
| 13          | 84      | 76      | 81      |
| 15          | 92      | 92      | 88      |
| 17          | 100     | 98      | 99      |

**Table S16.** Intensities of color for 11.5 ppm fluoride

| Time<br>(h) | Trial 1 | Trial 2 |
|-------------|---------|---------|
| 11          | 3       | 2       |
| 13          | 6       | 5       |
| 15          | 7       | 4       |
| 17          | 12      | 8       |
| 19          | 28      | 16      |
| 21          | 48      | 35      |
| 23          | 58      | 68      |
| 25          | 82      | 76      |
| 27          | 99      | 87      |
| 29          | 101     | 99      |
| 31          | 101     | 101     |

**Table S17.** Intensities of color for 2.3 ppm fluoride

| Time<br>(h) | Trial 1 | Trial 2 |
|-------------|---------|---------|
| 31          | 2       | 0       |
| 33          | 4       | 5       |
| 35          | 5       | 8       |
| 37          | 14      | 18      |
| 39          | 31      | 37      |
| 41          | 58      | 62      |
| 43          | 79      | 79      |
| 45          | 91      | 95      |
| 47          | 99      | 101     |

**Table S18.** Intensities of color for 0.0 ppm fluoride

| Time<br>(h) | Trial 1 | Trial 2 | Trial 3 |
|-------------|---------|---------|---------|
| 35          | 2       | 2       | 1       |
| 37          | 5       | 3       | 3       |
| 39          | 15      | 6       | 4       |
| 41          | 31      | 19      | 10      |
| 43          | 56      | 44      | 24      |
| 45          | 77      | 69      | 55      |
| 47          | 87      | 81      | 71      |
| 49          | 101     | 97      | 88      |
| 51          | 101     | 101     | 101     |

## Selectivity of Compound 1 for Fluoride over Other Anions in Methanol (Figure 3c)

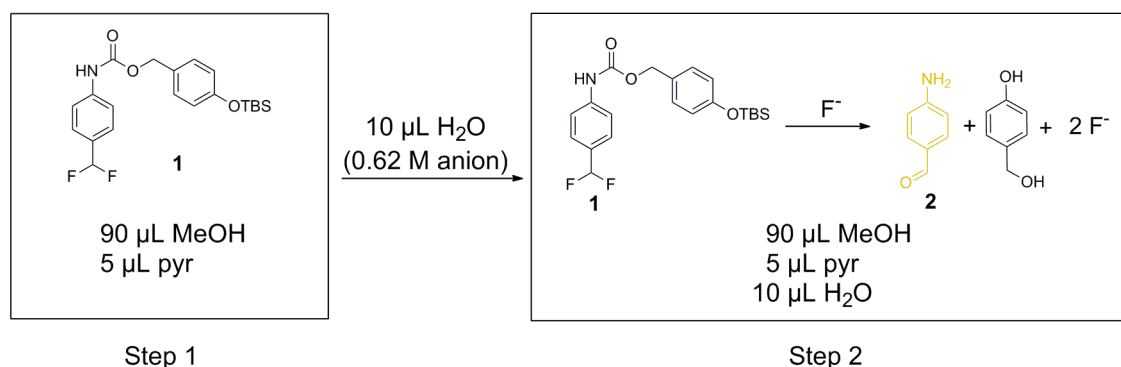

**Scheme S4.** In separate experiments, CsF, KCl, KBr, KI, KNO<sub>3</sub>, KSCN, KO<sub>2</sub>CCH<sub>3</sub>, tetrabutylammonium phosphate and tetrabutylammonium sulfate (0.5 equivalents) were added to a 0.12 M solution of compound 1 (105 µL) in 18:1:2 MeOH–pyridine–H<sub>2</sub>O at 23 °C. Photographs were obtained after 3 h of amplification using the procedure described in Scheme S1.

**Table S26.** Intensities of color for the selectivity study in Figure 3c.

| anion                                        | Trial 1 | Trial 2 | Trial 3 |
|----------------------------------------------|---------|---------|---------|
| Cl <sup>-</sup>                              | 4       | 3       | 2       |
| Br <sup>-</sup>                              | 1       | 0       | 0       |
| I <sup>-</sup>                               | 1       | 0       | 3       |
| NO <sub>3</sub> <sup>-</sup>                 | 2       | 1       | 2       |
| H <sub>2</sub> PO <sub>4</sub> <sup>-</sup>  | 0       | 1       | 0       |
| SO <sub>4</sub> <sup>2-</sup>                | 1       | 0       | 1       |
| SCN <sup>-</sup>                             | 0       | 1       | 4       |
| CH <sub>3</sub> CO <sub>2</sub> <sup>-</sup> | 3       | 4       | 4       |
| F <sup>-</sup>                               | 97      | 97      | 97      |
| No Ions                                      | 3       | 2       | 1       |

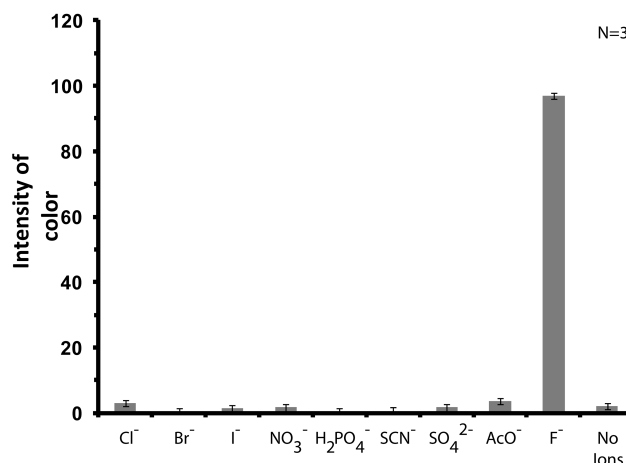

**Figure S1.** In separate experiments nine different anions (0.5 equiv, 10 µL H<sub>2</sub>O) were added to a 0.13 M solution of compound 1 (95 µL) in 18:1 MeOH/pyr. Photographs were taken after 3 h of amplification. Error bars reflect the standard deviations from the average value.



## Procedure for Measuring the Colorimetric Readout Provided by Reagent 3 (Figure 4b)

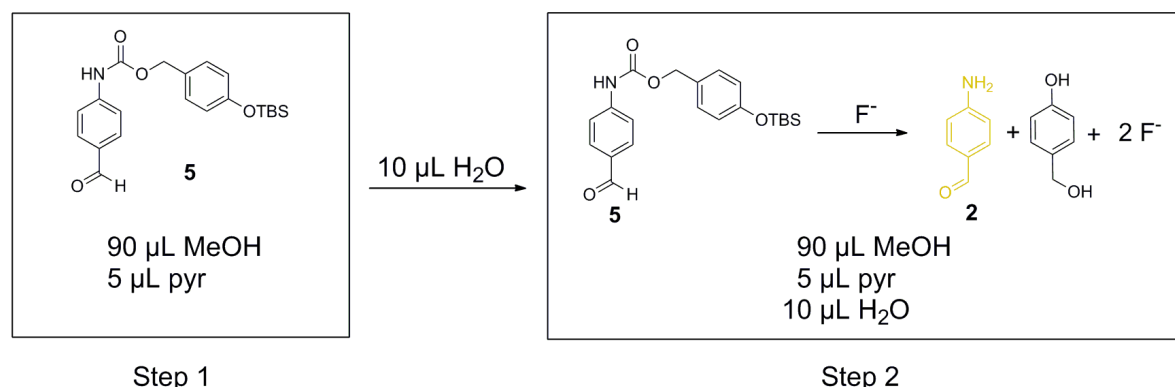

**Scheme S3.** Aliquots (10 µL) of solutions of CsF (610 µM – 1.22 M) were added to separate 0.12 M solutions of compound **5** in 18:1 MeOH–pyridine (95 µL). At hour intervals, photographs were obtained and analyzed using Adobe®Photoshop®. The digital images were cropped just above and below the solution in the centrifuge tube. The image was magnified six times and the color was inverted using the inversion setting. Using the circular marquee tool, a section of approximately 300 pixels just below the meniscus of the solution was highlighted. The mean intensity in the blue channel on the histogram function was recorded. The mean intensities were subtracted from the mean intensities for the centrifuge tubes at time 0.

### Tables of Color Intensity for Figure 4b

**Table S19.** Intensities of color for 23,000 ppm fluoride

| Time (h) | Trial 1 | Trial 2 | Trial 3 |
|----------|---------|---------|---------|
| 1        | 61      | 60      | 59      |
| 4        | 60      | 59      | 58      |
| 8        | 54      | 53      | 53      |
| 12       | 56      | 55      | 54      |
| 16       | 55      | 55      | 55      |
| 22       | 53      | 53      | 51      |
| 30       | 55      | 56      | 55      |
| 38       | 56      | 55      | 56      |
| 46       | 57      | 55      | 57      |
| 51       | 58      | 58      | 57      |

**Table S20.** Intensities of color for 2,300 ppm fluoride

| Time (h) | Trial 1 | Trial 2 | Trial 3 |
|----------|---------|---------|---------|
| 1        | 30      | 32      | 26      |
| 4        | 30      | 32      | 31      |
| 8        | 31      | 33      | 33      |
| 12       | 30      | 30      | 31      |
| 16       | 33      | 33      | 33      |
| 22       | 31      | 31      | 31      |
| 30       | 32      | 34      | 34      |
| 38       | 30      | 32      | 30      |
| 46       | 29      | 30      | 31      |
| 51       | 29      | 31      | 28      |

**Table S21.** Intensities of color for 230 ppm fluoride

| Time<br>(h) | Trial 1 | Trial 2 | Trial 3 |
|-------------|---------|---------|---------|
| 1           | 7       | 6       | 7       |
| 4           | 9       | 5       | 4       |
| 8           | 8       | 6       | 9       |
| 12          | 8       | 5       | 5       |
| 16          | 11      | 9       | 10      |
| 22          | 8       | 7       | 8       |
| 30          | 12      | 9       | 8       |
| 38          | 9       | 7       | 7       |
| 46          | 9       | 7       | 8       |
| 51          | 7       | 4       | 5       |

**Table S22.** Intensities of color for 23 ppm fluoride

| Time<br>(h) | Trial 1 | Trial 2 | Trial 3 |
|-------------|---------|---------|---------|
| 1           | 3       | 4       | 4       |
| 4           | 4       | 3       | 4       |
| 8           | 4       | 3       | 4       |
| 12          | 1       | 2       | 1       |
| 16          | 5       | 5       | 5       |
| 22          | 2       | 2       | 2       |
| 30          | 4       | 7       | 7       |
| 38          | 3       | 3       | 4       |
| 46          | 4       | 4       | 5       |
| 51          | 2       | 3       | 3       |

**Table S23.** Intensities of color for 11.5 ppm fluoride

| Time<br>(h) | Trial 1 | Trial 2 | Trial 3 |
|-------------|---------|---------|---------|
| 1           | 2       | 3       | 3       |
| 4           | 3       | 4       | 3       |
| 8           | 2       | 2       | 2       |
| 12          | 0       | 1       | 1       |
| 16          | 4       | 4       | 6       |
| 22          | 2       | 4       | 3       |
| 30          | 7       | 1       | 6       |
| 38          | 3       | 3       | 4       |
| 46          | 2       | 5       | 3       |
| 51          | 2       | 3       | 3       |

**Table S24.** Intensities of color for 2.3 ppm fluoride

| Time<br>(h) | Trial 1 | Trial 2 | Trial 3 |
|-------------|---------|---------|---------|
| 1           | 4       | 3       | 5       |
| 4           | 1       | 5       | 4       |
| 8           | 1       | 3       | 3       |
| 12          | 2       | 1       | 1       |
| 16          | 5       | 5       | 7       |
| 22          | 3       | 3       | 3       |
| 30          | 6       | 7       | 5       |
| 38          | 4       | 5       | 5       |
| 46          | 5       | 7       | 2       |
| 51          | 2       | 3       | 3       |

**Table S25.** Intensities of color for 0.0 ppm fluoride

| Time<br>(h) | Trial 1 | Trial 2 | Trial 3 |
|-------------|---------|---------|---------|
| 1           | 4       | 3       | 4       |
| 4           | 3       | 1       | 2       |
| 8           | 2       | 1       | 3       |
| 12          | 1       | 0       | 1       |
| 16          | 5       | 5       | 5       |
| 22          | 2       | 3       | 3       |
| 30          | 7       | 4       | 8       |
| 38          | 3       | 2       | 4       |
| 46          | 4       | 4       | 2       |
| 51          | 3       | 2       | 4       |

## Procedure for Measuring the Autoinductive Colorimetric Readout Provided by Reagent 1 in Isopropyl Alcohol (Figure 5a)

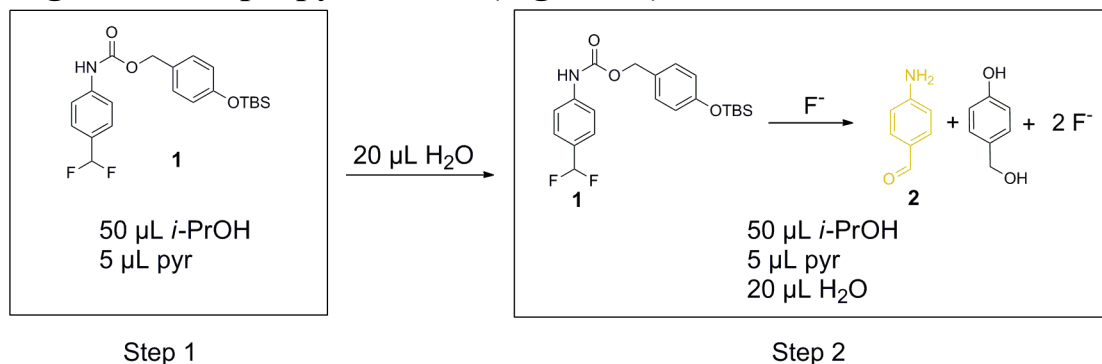

**Scheme S5.** Aliquots (20 µL) of solutions of CsF (610 µM – 1.22 M) were added to separate 0.22 M solutions of compound **1** in 10:1 isopropyl alcohol–pyridine (55 µL). At hour intervals, photographs were obtained and analyzed using Adobe®Photoshop®. The digital images were cropped just above and below the solution in the centrifuge tube. The image was magnified six times and the color was inverted using the inversion setting. Using the circular marquee tool, a section of approximately 300 pixels just below the meniscus of the solution was highlighted. The mean intensity in the blue channel on the histogram function was recorded. The mean intensities were subtracted from the mean intensities for the centrifuge tubes at time 0.

### Tables of Color Intensity for Figure 5a

**Table S27:** Intensities of color for 2,300 ppm fluoride

| Time (min) | Trial 1 | Trial 2 | Trial 3 |
|------------|---------|---------|---------|
| 0          | 169     | 169     | 168     |
| 10         | 198     | 196     | 193     |
| 20         | 228     | 225     | 225     |
| 30         | 246     | 245     | 246     |
| 40         | 251     | 250     | 251     |
| 50         | 253     | 252     | 254     |
| 60         | 254     | 253     | 252     |
| 80         | 254     | 253     | 254     |

**Table S28.** Intensities of color for 230 ppm fluoride

| Time (min) | Trial 1 | Trial 2 | Trial 3 |
|------------|---------|---------|---------|
| 0          | 169     | 170     | 170     |
| 20         | 200     | 201     | 202     |
| 40         | 238     | 238     | 238     |
| 60         | 248     | 247     | 248     |
| 80         | 251     | 250     | 251     |
| 100        | 252     | 252     | 252     |
| 120        | 254     | 253     | 253     |
| 140        | 255     | 254     | 254     |
| 160        | 254     | 253     | 253     |

**Table S29.** Intensities of color for 23 ppm fluoride

| Time<br>(min) | Trial 1 | Trial 2 | Trial 3 |
|---------------|---------|---------|---------|
| 0             | 171     | 169     | 170     |
| 20            | 169     | 167     | 168     |
| 40            | 185     | 182     | 184     |
| 60            | 199     | 197     | 198     |
| 80            | 211     | 208     | 211     |
| 100           | 221     | 220     | 221     |
| 120           | 230     | 228     | 229     |
| 140           | 232     | 232     | 233     |
| 160           | 237     | 236     | 237     |
| 180           | 240     | 239     | 240     |
| 200           | 242     | 242     | 241     |
| 220           | 245     | 244     | 245     |
| 240           | 248     | 247     | 248     |
| 260           | 251     | 248     | 250     |
| 280           | 250     | 250     | 250     |
| 300           | 251     | 251     | 251     |
| 320           | 251     | 251     | 251     |

**Table S30.** Intensities of color for 2.3 ppm fluoride

| Time<br>(h) | Trial 1 | Trial 2 | Trial 3 | Trial 4 |
|-------------|---------|---------|---------|---------|
| 0           | 171     | 168     | 171     | 169     |
| 2           | 167     | 167     | 168     | 169     |
| 4           | 169     | 174     | 174     | 173     |
| 6           | 176     | 173     | 174     | 172     |
| 7           | 177     | 180     | 180     | 179     |
| 8           | 187     | 187     | 189     | 190     |
| 9           | 207     | 210     | 212     | 211     |
| 10          | 221     | 224     | 227     | 228     |
| 11          | 235     | 236     | 238     | 239     |
| 12          | 242     | 244     | 244     | 245     |
| 13          | 249     | 249     | 250     | 250     |
| 14          | 252     | 252     | 252     | 252     |
| 15          | 253     | 252     | 252     | 252     |
| 16          | 255     | 254     | 255     | 254     |
| 17          | 255     | 255     | 254     | 254     |

**Table S31.** Intensities of color for 0.0 ppm fluoride

| Time<br>(h) | Trial 1 | Trial 2 | Trial 3 | Trial 4 |
|-------------|---------|---------|---------|---------|
| 0           | 169     | 168     | 169     | 171     |
| 2           | 164     | 164     | 165     | 165     |
| 4           | 173     | 172     | 174     | 173     |
| 6           | 166     | 166     | 167     | 169     |
| 8           | 169     | 168     | 170     | 169     |
| 10          | 172     | 171     | 170     | 170     |
| 11          | 173     | 174     | 172     | 173     |
| 12          | 177     | 174     | 174     | 174     |
| 13          | 184     | 178     | 176     | 183     |
| 14          | 193     | 187     | 185     | 198     |
| 15          | 202     | 188     | 187     | 203     |
| 16          | 226     | 220     | 218     | 233     |
| 17          | 237     | 231     | 241     | 230     |
| 18          | 244     | 241     | 241     | 247     |
| 19          | 249     | 243     | 245     | 250     |
| 20          | 252     | 249     | 250     | 251     |
| 21          | 254     | 253     | 253     | 254     |
| 22          | 255     | 252     | 252     | 253     |

## Selectivity of Compound 1 for Fluoride over Other Anions in Isopropanol (Figure 5c)

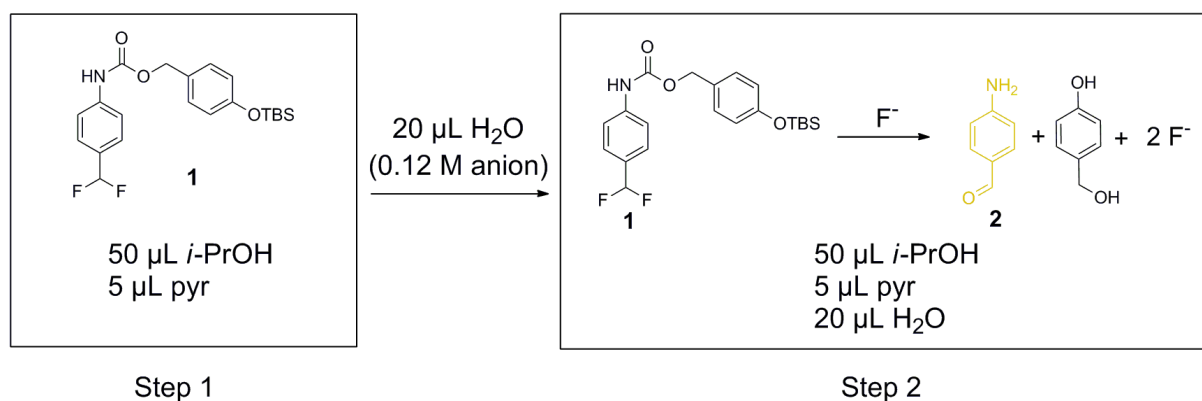

**Scheme S6.** In separate experiments, CsF, KCl, KBr, KI,  $\text{KNO}_3$ , KSCN,  $\text{KO}_2\text{CCH}_3$ , tetrabutylammonium phosphate and tetrabutylammonium sulfate (0.2 equivalents, 20  $\mu\text{L}$ ) were added to a 0.22 M solution of compound **1** (55  $\mu\text{L}$ ) in 10:1 *i*-PrOH–pyridine at 23  $^\circ\text{C}$ . Photographs were obtained after 2 h of amplification using the procedure described in Scheme S2.

**Table S32.** Intensities of color for the selectivity study in Figure 5c.

| Anion                      | Trial 1 | Trial 2 | Trial 3 |
|----------------------------|---------|---------|---------|
| $\text{Cl}^-$              | 1       | 1       | 1       |
| $\text{Br}^-$              | 0       | 0       | 0       |
| $\text{I}^-$               | 1       | 1       | 0       |
| $\text{NO}_3^-$            | 0       | 0       | 0       |
| $\text{H}_2\text{PO}_4^-$  | 0       | 0       | 1       |
| $\text{SO}_4^{2-}$         | 2       | 3       | 1       |
| $\text{SCN}^-$             | 0       | 0       | 0       |
| $\text{CH}_3\text{CO}_2^-$ | 0       | 0       | 0       |
| $\text{F}^-$               | 86      | 86      | 86      |
| No Ions                    | 0       | 0       | 0       |

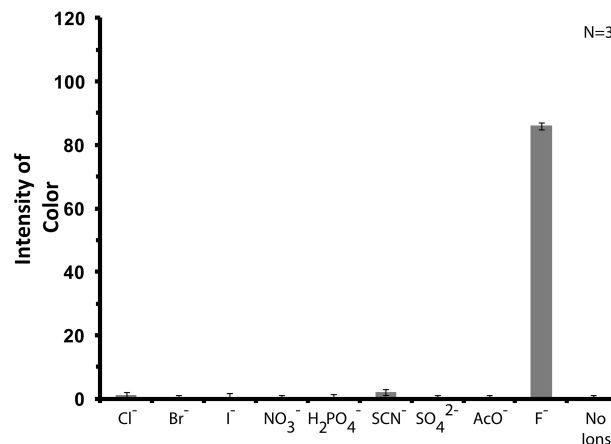

**Figure S2.** In separate experiments nine different anions (0.2 equiv, 20  $\mu\text{L}$   $\text{H}_2\text{O}$ ) were added to a 0.22 M solution of compound **1** (55  $\mu\text{L}$ ) in 10:1 *i*-PrOH/pyr. Photographs were taken after 2 h of amplification. Error bars reflect the standard deviations from the average value.

## References

- 1) Still, W. C.; Kahn, M.; Mitra, A. *J. Org. Chem.* **1978**, *43*, 2923–2925.
- 2) Baker, M. S.; Phillips, S. T. *J. Am. Chem. Soc.* **2011**, *133*, 5170–5173.
- 3) Nuñez, S. A.; Yeung, K.; Fox, N. S.; Phillips, S. T. *J. Org. Chem.* **2011**, *76*, 10099–10113.

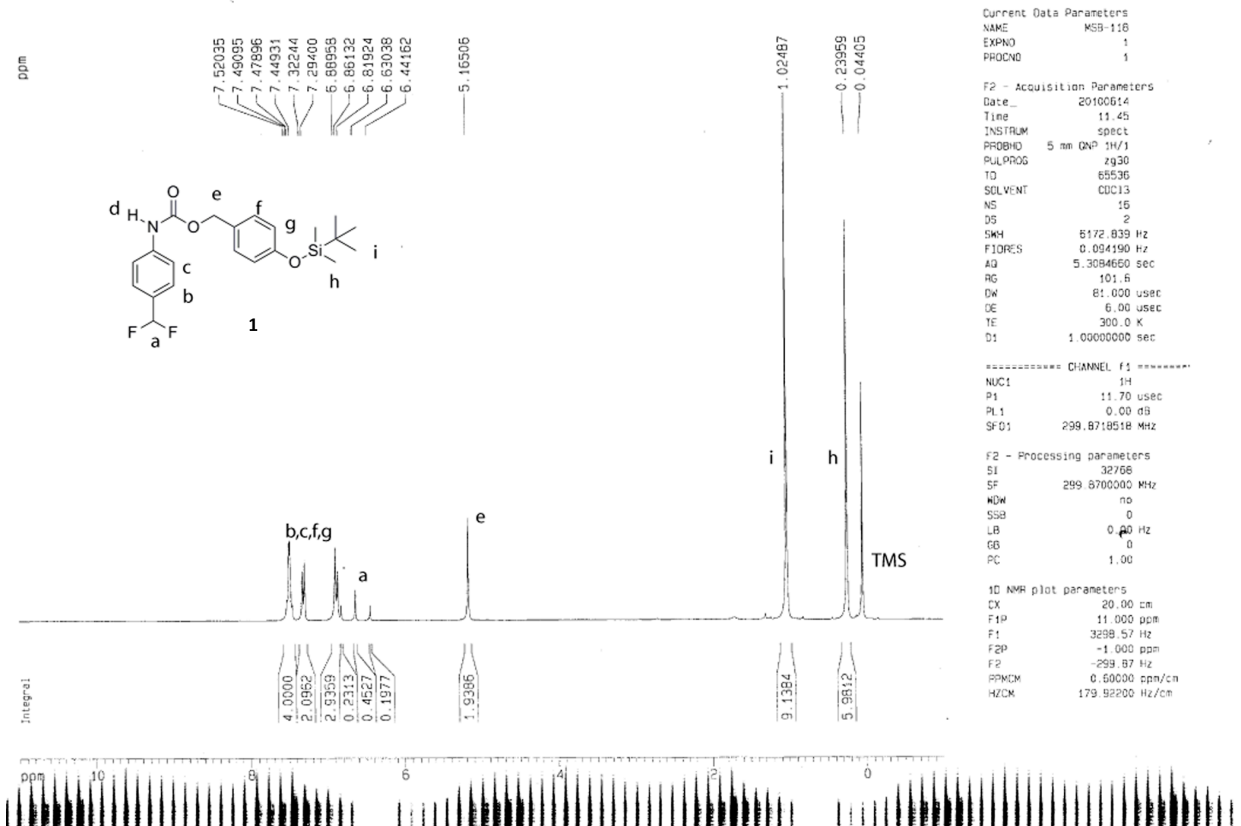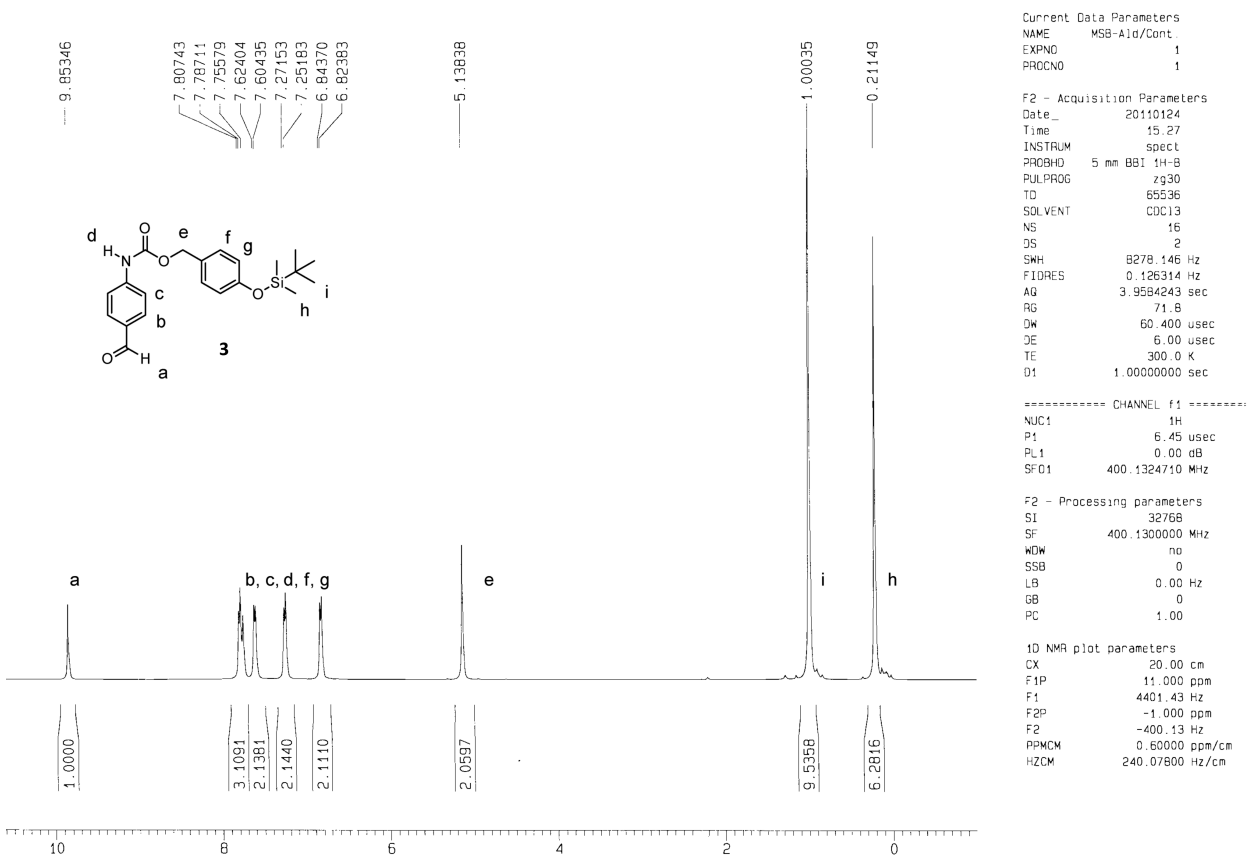

Supplement: c2ob25363a.pdf [file c2ob25363a.pdf]
